# Supplementary material for: Widespread post-transcriptional regulation of co-transmission
Source: PubMed Central journal article supplement — bioRxiv. 2023 Mar 2:2023.03.01.530653. Preprint. [Version 1] doi: 10.1101/2023.03.01.530653 (PMC10002718; doi:10.1101/2023.03.01.530653), 2023-03-02
Supplement: NIHPP2023.03.01.530653v1-supplement-2.pdf [file NIHPP2023.03.01.530653v1-supplement-2.pdf]

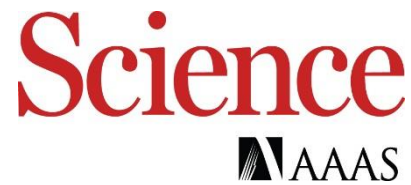

414  
415  
416  
417  
418  
419  
420  
421  
422  
423  
424  
425  
426  
427  
428  
429  
430  
431  
432  
433  
434  
435  
436

## Supplementary Materials for

### Widespread post-transcriptional regulation of co-transmission

Yunpeng Zhang<sup>1†</sup>, Nannan Chen<sup>1†</sup>, Emmanuel J. Rivera-Rodriguez<sup>1†</sup>, Albert D. Yu<sup>1,2</sup>, Michael Hobin<sup>1</sup>, Michael Rosbash<sup>1,2</sup> and Leslie C. Griffith<sup>1\*</sup>

Correspondence to: [griffith@brandeis.edu](mailto:griffith@brandeis.edu)

#### **This PDF file includes:**

Materials and Methods  
Figs. S1 to S11  
Tables S1 to S3  
Captions for Data S1

437 **Materials and Methods**

438

439 **Fly strains and husbandry**

440 All flies were raised on standard food at 25 °C with a 12h:12h light-dark cycle, except for the  
441 *Tubulin-Gal80<sup>ts</sup>* experiments to induce expression at different developmental stages, where flies  
442 were raised at either 18 °C or 29 °C. Male and female flies were collected at eclosion and aged as  
443 specified before performing experiments. *VT030559-GAL4* was obtained from Vienna  
444 *Drosophila* Resource Center (VDRC) stock center. *VAcHT<sup>MI082441</sup>* (#55439), *nsyb-Gal4*  
445 (#51941), *VGluT-Gal4* (#60312), *VGluT-p65-AD* (#82986), *VGluT-GAL4-*  
446 *DBD* (#60313), *ChAT-Gal4* (#60317), *GHI46-Gal4* (#30026), *GMR81C04-*  
447 *Gal4* (#48378), *VGAT-Gal4* (#84696), *UAS-miR-190-sponge* (#61397), *UAS-scramble-*  
448 *sponge* (#61501), *UAS-Flp* (#4539), *UAS-CD4-GFP<sup>1-10</sup>* (#93016), *VGluT-Gal80* (#58448) and  
449 *tubulin-Gal80<sup>ts</sup>* (#7016) were obtained from Bloomington *Drosophila* stock center. *UAS-*  
450 *myrGFP-2A-RedStinger* (27) was obtained from the Ganetzky lab at University of Wisconsin,  
451 and *UAS-UNC84::GFP* from Gilbert Henry at Janelia Research Campus.

452 **Generation of *EGFP::VAcHT*, *RFP::VGluT* and *RFP::VGAT* lines**

453 To knock in *EGFP* at the N-terminal of *VAcHT*, we designed a guide RNA which recognized the  
454 beginning of *VAcHT* with an online tool (<http://targetfinder.flycrispr.neuro.brown.edu/>) and  
455 created a donor plasmid (pMC1-EGFP-VAcHT plasmid in Data S1). The guide RNA was cloned  
456 into a pU6 plasmid (Addgene, #45946) and injected into Cas9 flies (*y,sc,v; nos-Cas9/CyO; +/-*)  
457 with the donor plasmid. By the same strategy, we knocked in *RFP* at the N-terminal of *VGluT*  
458 and *VGAT*. All guide RNAs are listed in Table S1 and donor plasmids are shown in Data S1.  
459 Correct integrations were confirmed by PCR and sequencing with primers which bind outside  
460 the regions of the integrated junction.

461

462 **Creation of *Frt-stop-Frt-EGFP::VACHT*, *Frt-stop-Frt-EGFP::VGluT* and *Frt-stop-Frt-***  
463 ***EGFP::VGAT* flies**

464 For the *Frt-stop-Frt-EGFP::VACHT* fly strain, we used the same guide RNA as *EGFP::VACHT*  
465 and made a donor plasmid (pMC10-Frt-stop-3p3-RFP-Frt-EGFP::VACHT plasmid in Data S1).  
466 We amplified the stop sequence which was flanked by two Frt sites, *EGFP* sequence, and  
467 *VACHT* sequence. 3P3 RFP sequence was amplified and inserted between stop and the second Frt  
468 site for screening. These fragments were assembled in order and cloned into the pMC10 plasmid.  
469 The guide RNA was cloned into pU6 plasmids and injected into Cas9 flies with the donor  
470 plasmid. F1 progeny with RFP markers were selected as candidates, and further confirmation  
471 was performed by PCR and sequencing. By the same strategy, we made *Frt-stop-Frt-*  
472 *EGFP::VGluT* and *Frt-stop-Frt-EGFP::VGAT* flies. The guide RNAs are listed in Table S1, and  
473 the donor plasmids were shown as pMC10-Frt-stop-3P3-RFP-Frt-EGFP::VGluT and pMC10-  
474 Frt-stop-3P3-RFP-Frt-EGFP::VGAT in Data S1.

475 **Creation of *Flp-VACHT-3'UTR* flies**

476 For the *Flp-VACHT-3'UTR* fly strain, we used the same guide RNA as *EGFP::VACHT* and made  
477 a donor plasmid (pMC10-Flp-VACHT-3'UTR plasmid in Data S1). The guide RNA was cloned  
478 into the pU6 plasmid and injected into Cas9 flies with the donor plasmid. Correct integrations  
479 were confirmed by PCR and sequencing.

480 **Creation of split-Gal4 lines**

481 To make the *VACHT-AD* and *VACHT-DBD* fly strains, the phase 0 T2A-p65AD-Hsp70 plasmid  
482 (Addgene, #62914) and T2A-Gal4DBD-Hsp70 plasmid (Addgene, #62903) were injected into  
483 *VACHT*<sup>[M108244]</sup> flies with pBS130 plasmid (Addgene, #26290) which encodes phiC31 integrase.  
484 Progeny were crossed to *yw* flies to check for spGAL4 insertion. Male flies with yellow marker

485 were selected as candidates, and then checked by PCR to obtain insertion lines in the correct  
486 orientation.

487 For the *VGAT-AD* and *VGAT-DBD* lines, we first made a *3P3-RFP-VGAT* fly strain utilizing the  
488 same guide RNA as *RFP::VGAT* (Table S1) and a donor plasmid which contained attP flanked  
489 *3P3-RFP* sequences (Fig. S1A). Flies were first screened for RFP expression, and then  
490 confirmed by PCR and sequencing. To make *VGAT-AD* flies, the AD sequence was amplified  
491 from T2A-p65AD-Hsp70 plasmid (Addgene, #62914) and attached at the N terminal of the  
492 VGAT sequence. The whole AD sequence which was flanked by two inverted-attB sites was  
493 cloned into the pBS-KS-attB2 plasmid (Addgene, #62897). This plasmid was injected into *3P3-*  
494 *RFP-VGAT* flies, with plasmids that expressed phiC31 recombinase. By the same strategy, we  
495 made *VGAT-DBD* flies using T2A-Gal4DBD-Hsp70 plasmid (Addgene, #62903). F1 progeny  
496 without RFP marker were selected as candidates, and further confirmation by PCR and  
497 sequencing were performed.

#### 498 **Creation of *VACHT-GFP<sup>1-10</sup>*, *VACHT-GFP<sup>11</sup>*, and *VGAT-GFP<sup>11</sup>* lines**

499 To make the *VACHT-GFP<sup>1-10</sup>* and *VACHT-GFP<sup>11</sup>* fly strains, we first chosen a luminal-side  
500 insertion site using *in silico* prediction (<https://phobius.sbc.su.se/>). We used the same guide RNA  
501 as *EGFP::VACHT*, and created donor plasmids (*VACHT-GFP1-10* plasmid and *VACHT-GFP11*  
502 plasmid in Data S1). The guide RNA was cloned into a pU6 plasmid and injected into Cas9 flies  
503 with the donor plasmids. Correct integrations were confirmed by PCR and sequencing.

504 For the *VGAT-GFP<sup>11</sup>* line, a luminal-side insertion site was chosen using *in silico* prediction  
505 (<https://phobius.sbc.su.se/>). The GFP<sup>11</sup> sequence was inserted at the last luminal side site of the  
506 VGAT. The whole sequence was flanked by two inverted-attB sites, and cloned into the pBS-  
507 KS-attB2 plasmid (Addgene, #62897). This plasmid (*VGAT-GFP11* plasmid in Data S1) was  
508 injected into *3P3-RFP-VGAT* flies showed above, with plasmids that expressed phiC31

509 recombinase. F1 progeny without RFP marker were selected as candidates, and further  
510 confirmation by PCR and sequencing were performed. Luminal location of the tags was  
511 confirmed as shown in Fig. S11.

### 512 **Creation of *UAS-ChAT*, *UAS-VACHT*, *UAS-Fluc-ChAT 3'UTR* and *UAS-Fluc-ChAT del*** 513 **lines**

514 For the *UAS-RFP::ChAT* fly strain, the coding region of ChAT was amplified from a *Canton-S*  
515 wild type fly cDNA library, and inserted into the pUAST-attB plasmid (Addgene, 8489bp) using  
516 the Gibson assembly method (*UAS-RFP::ChAT* plasmid in Data S1). To allow visualization of  
517 ChAT expression, RFP was inserted in-frame before the ChAT coding region. Using the same  
518 strategy, GFP1-10 and VACHT coding regions were amplified and inserted into pUAST-attB to  
519 make the *UAS- VACHT* fly line (*UAS- GFP1-10::VACHT* plasmid in Data S1).

520 For the *UAS-Fluc-ChAT 3'UTR* fly line, we amplified the Fluc sequence from the Ac/Fluc  
521 plasmid (a gift of Ravi Allada) and the ChAT 3'UTR sequence from the *Canton-S* wild type fly  
522 genome. These sequences were assembled in order and cloned into the pUAST-attB plasmid  
523 (*UAS-Fluc-ChAT 3'UTR* plasmid in Data S1). For the *UAS-Fluc-ChAT del* fly line, the same  
524 sequences were used, except that the predicted miR-190 binding sites were removed from ChAT  
525 3'UTR (*UAS-Fluc-ChAT del* plasmid in Data S1).

526 All plasmids were checked by sequencing. *UAS-RFP::ChAT*, *UAS-Fluc-ChAT 3'UTR* and  
527 *UAS-Fluc-ChAT del* plasmids were injected into *phiC31-attP* flies (Bloomington Stock Center  
528 #79604) which have an attP site on the second chromosome to allow targeted integration. *UAS-*  
529 *GFP1-10::VACHT* plasmid was injected into *phiC31-attP* flies (Bloomington Stock Center  
530 #8622), which have an attP site on the third chromosome. The progeny of injected flies was  
531 screened for  $w^+$  red eye marker, and then checked by PCR and sequencing.

### 532 **INTACT purification of nuclei**

533 Nuclei from *Glu<sup>ACh</sup>>UNC84::GFP* and *GABA<sup>ACh</sup>>UNC84::GFP* heads were prepared according  
534 to the INTACT protocol (13), with some adjustments. Briefly, whole flies were flash frozen on  
535 dry ice in 15 ml tubes and vortexed for 5 cycles of 15 s vortexing at max speed and 1 min of  
536 resting on dry ice. Heads were separated from bodies using frozen No.40 and No.25 brass sieves.  
537 Sieved heads were placed in pre-chilled 1 ml dounce homogenizers and homogenized using a  
538 modified INTACT lysis buffer (10mM Tris-HCl pH7.5, 2mM MgCl<sub>2</sub>, 10mM KCl, 0.6mM  
539 Spermidine, 0.2mM Spermine, 1mM DTT, 0.03% Tween-20, 1% BSA, 1x cOmplete Protease  
540 inhibitor), for 15 strokes with Pestle A and 15 strokes of Pestle B. Homogenized lysate was  
541 filtered through a 20 µm CellTrics Filter (Sysmex Flow Cytometry), centrifuged for 5 min at 800  
542 RCF. Supernatant was removed and lysate was resuspended in modified INTACT lysis buffer  
543 and filtered through a 10 µm CellTrics Filter (Sysmex Flow Cytometry). Filtered lysate was then  
544 subject to anti-GFP immunoprecipitation and RNA extraction as previously described (13).

#### 545 **RNA-seq and data analysis**

546 Purified RNA was subject to PolyA enrichment using the Poly(A)Purist Mag Kit (Thermofisher)  
547 according to protocol. Purified Poly(A) RNA was quantified using the Qubit 2.0 RNA HS Assay  
548 (Thermofisher), and 10 ng of RNA per sample was used for library prep using the NextFlex  
549 Rapid Directional qRNA-Seq Kit 2.0 (PerkinElmer) and sequenced on a NextSeq 550 using the  
550 75 cycle High Output Kit (Illumina).

551 UMIs were extracted and appended to reads from sequenced libraries using `umi_tools extract`  
552 with the following parameters: `--bc-pattern=NNNNNNNNNN --bc-pattern2=NNNNNNNNNN`.

553 Processed reads were then aligned against the dm6 reference genome with STAR using the  
554 following parameters: `--outFilterMismatchNoverLmax 0.05 --outFilterMatchNmin 15 --`  
555 `outFilterMultimap Nmax 1 --outSJfilterReads Unique --alignMatesGapMax 25000`. Aligned  
556 reads were converted to BAM files and sorted using `samtools`, and were deduplicated using

557 umi\_tools dedup. Reads were counted using featurecounts, and normalization and differential  
558 expression was conducted using Deseq2.

559 The full data set is available at NCBI; GEO accession number GSE221859

### 560 **Immunohistochemistry and image processing**

561 For dissection and staining of adult fly brains, the protocol from Janelia  
562 ([https://www.janelia.org/project-team/flylight/\\_protocols](https://www.janelia.org/project-team/flylight/_protocols)) was used. Briefly, brains were  
563 dissected in S2 solution, and then fixed in 2% PFA solution for 55 min at room temperature (RT).  
564 Then the samples were washed 4x10 mins by 0.5% PBST solution, and blocked with 5% goat  
565 serum in PBST solution for 1.5 hours. After that, the samples were incubated in primary  
566 antibody solutions for 4 hours at RT and continued incubation at 4 °C for over two nights. Then  
567 samples were washed 3x30 min by 0.5%PBST, incubated in secondary antibody solutions for 4  
568 hours at RT, with continued incubation at 4 °C for over three nights. The same washing protocol  
569 was performed after secondary antibody incubation, then fixed by 4% PFA again for 4h at RT  
570 and mounted in Vectashield mounting medium (Vector Laboratories).

571 The primary antibodies used were: rabbit anti-RFP (1:200, Takara), rabbit anti-GFP (1:1000,  
572 Thermo Fisher), mouse anti-GFP (1:200, Sigma), mouse anti-Brp (1:100, DSHB), anti-  
573 VGluT(28) (1:200, generous gift from Aaron DiAntonio, Washington University) and anti-  
574 VGAT (29) (1:200, generous gift from David Krantz, UCLA). Alexa Fluor 488 anti-  
575 mouse/rabbit antibody (Invitrogen) and Alexa Fluor 635 anti-mouse/rabbit antibody (Invitrogen)  
576 were used as secondary antibodies at 1:200 dilutions.

577 All images were taken using Leica SP5 confocal microscope under 20x or 60x objective lens.  
578 Then the pictures are processed and analyzed using ImageJ Fiji software(30).

### 579 **Sleep and locomotor activity**

580 Individual 3-5 day old male flies were loaded into 65mm x 5mm glass tubes (Trikinetics,  
581 Waltham, MA) using CO<sub>2</sub> anesthesia. One end of the tube is food containing 5% agarose and 2%  
582 sucrose, the other side is a cotton ball to cover it. The flies were entrained under standard 12:12  
583 light-dark conditions for 2 days prior to data collection.

584 Locomotor activity was collected with the *Drosophila* Activity Monitoring System (Trikinetics)  
585 as previously described (31). Sleep is defined as consecutive inactivity for five or more minutes  
586 (32). All sleep parameters, including total sleep duration, number of sleep episodes and mean  
587 episode duration were analyzed using an Matlab program described previously (31) and averaged  
588 across 4 days. Statistical analysis was performed with GraphPad Prism. For all sleep parameters  
589 a D'Agostino & Pearson test was used to determine normality of data. If data were normally  
590 distributed they were analyzed using a Student T-test or ANOVA followed by Tukey test for  
591 multiple comparisons (depending on the number of groups). If data were not normally distributed  
592 they were analyzed using a Mann-Whitney or Kruskal-Wallis test followed by Dunn's test for  
593 multiple comparisons.

#### 594 **S2 cell assay (33)**

595 S2 cells in 12-well plates were cotransfected with 15 ng of Ac/Fluc (or its derivatives), 15 ng of  
596 Ac/Rluc, and 270 ng of Ac/miR-190 or Ac/scramble by Effectene transfection reagent (Qiagen).  
597 Ac/Fluc derivatives included Fluc with ChAT-3'UTR, Fluc with VAcHT-3'UTR, and Fluc with  
598 ChAT-3'UTR with the three predicted miR-190 binding sites removed. The primers are listed in  
599 Table S2. Cells were harvested 48 hours after transfection and a dual luciferase assay was  
600 performed (Promega).

#### 601 ***In vivo* Luciferase assays**

602 15 male fly brains were collected for each sample, then homogenized in 100  $\mu$ l Promega Glo  
603 Lysis Buffer (Promega, Cat# E2510) at room temperature. Homogenized samples were



604 incubated for 10 min at room temperature, and then centrifuged for 5 min to pellet the brain  
605 remains. 50  $\mu$ l of supernatant was transferred to an Eppendorf tube on ice, and another 450  $\mu$ l  
606 lysis buffer was added. A multichannel pipette was used to transfer 20  $\mu$ l of each sample to a  
607 white-walled 96-well plate (Costar), then 20  $\mu$ l Promega Luciferase Reagent (Promega, Cat#  
608 E2510) was added to each well. The plate was incubated in dark for 10 min. Luminescence was  
609 measured on a Luminometer plate reader (Promega, Cat# GM3000).

610  
611

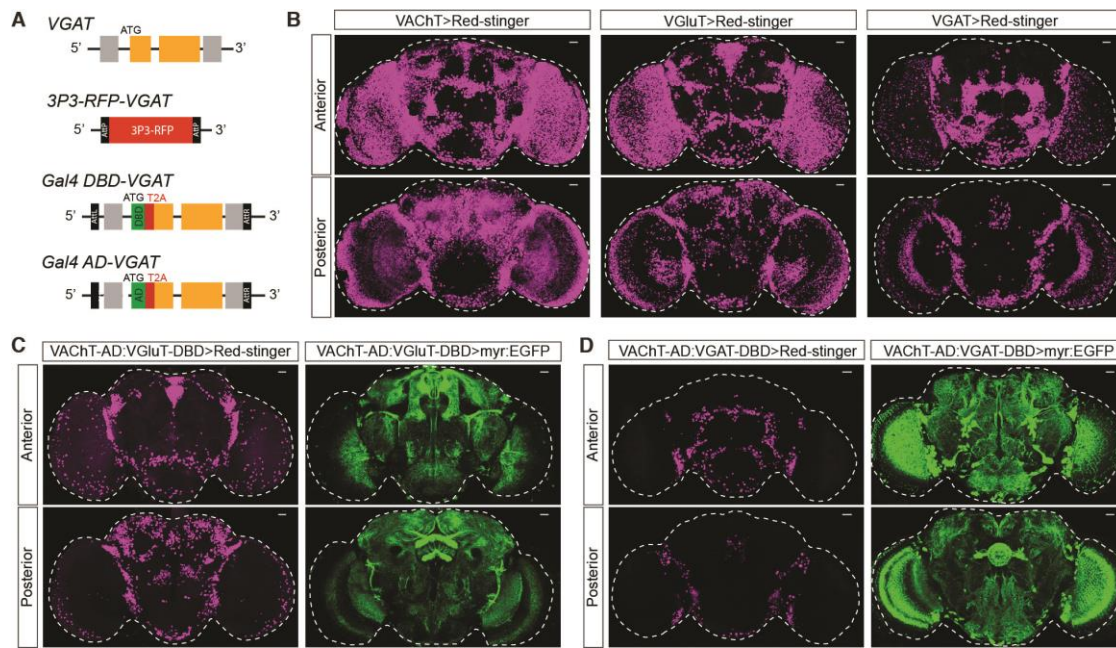

612

613 **Figure S1. Expression patterns of *VACHT:VGlut* and *VACHT:VGAT* split Gal4s.** (A)  
 614 Schematic diagram showing fused *Gal4-DBD* and *Gal4-AD* knock-in strategy: attp-flanked 3P3-  
 615 RFP was knocked in to replace the whole *VGAT* gene using CRISPR/Cas9. This cassette was  
 616 then is replaced by attb-DBD-T2A-*VGAT*-attb or attb-AD-T2A-*VGAT*-attb using *phiC31*  
 617 recombination. Grey bars indicate the UTRs, while yellow bars indicate exons. (B) Magenta  
 618 shows the soma (nuclei) of *VACHT-Gal4*, *VGlut-Gal4* and *VGAT-Gal4* expression patterns:  
 619 anterior views (top) and posterior (bottom). (C-D) Magenta shows the somatic regions of  
 620 *VACHT-AD:VGlut-DBD* split-Gal4 (C) and *VACHT-AD:VGAT-DBD* split-Gal4 (D) flies, while  
 621 green shows the neuronal projection regions. Dashed white lines indicate the whole brain outline.  
 622 Scale bars = 20  $\mu$ m for each panel. Comparison of the number of cells in B vs C/D shows that the  
 623 split-GAL4s represent only a subset of the neurons captured by the broader drivers.

624

625

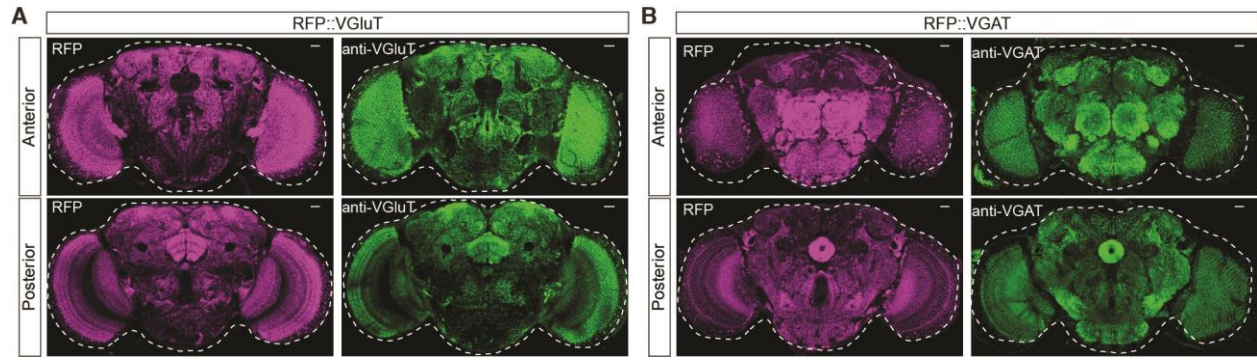

626

627

628

629

630

631

632

633

**Figure S2. Validation of fusion alleles.** To validate the expression patterns of our tagged vNTs, we stained heterozygous animals which have one FP-tagged allele and one untagged allele with anti-VGAT or anti-VGluT. RFP::VGluT protein from our fusion allele overlaps with wildtype chromosome VGluT staining in *RFP::VGluT/+* animals (**A**). RFP::VGAT protein overlaps with wild type chromosome VGAT staining in *RFP::VGAT/+* animals (**B**). Anterior (top) and posterior (down) pictures are shown separately. Scale bars = 20  $\mu$ m.

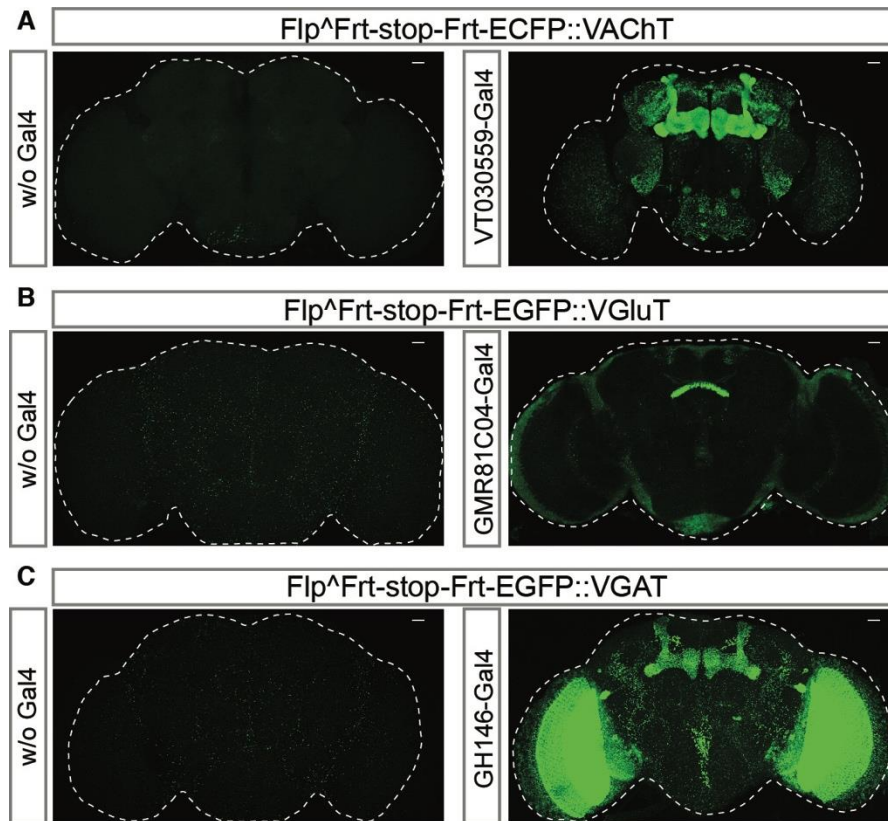

634

635

636

637

638

639

640

641

642

643

644

645

**Figure S3. Validation of conditional vNT::FP fusion alleles.** Gal-4 drivers for brain regions known to contain neurons expressing a particular neurotransmitter system were used to validate our flip-out strategy. **(A)** *VT030559-Gal4* driving FLP recombinase allows expression of ECFP::VAcHT in the mushroom body Kenyon cells, which are known to be cholinergic. No ECFP signal is present without GAL4 expression. **(B)** *GMR81C04-Gal4* driving Flp recombinase allows EGFP::VGluT protein expression in FSB neurons, which are glutamatergic. No EGFP signal is detected when no GAL4 is expressed. **(C)** *GH146-GAL4* driving Flp recombination derepresses EGFP::VGAT protein expression in the APL neurons which are known to be GABAergic. No EGFP signal is detected without GAL4 expression. Dashed white lines indicate the brain outline. Scale bars = 20  $\mu$ m.

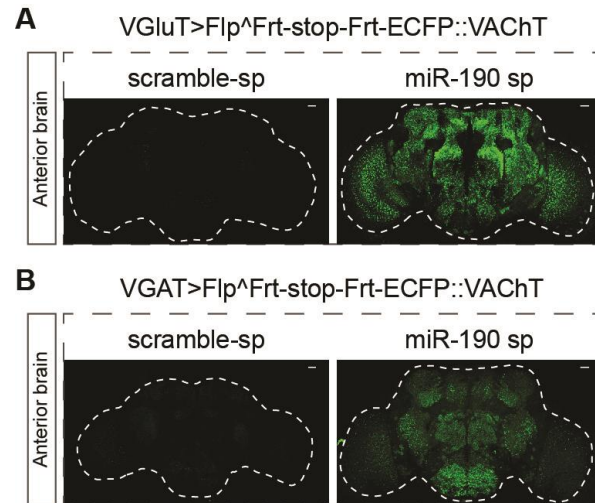

646

647

648

649

650

651

**Figure S4. Suppression of miR-190 function allows VChT protein expression in VGlut (A) and VGAT (B) positive neurons.** Representative pictures show the anterior brain signals. Posterior brain stacks are shown in Fig. 2C-D. Dashed white lines indicate the outline of the brain. Scale bars = 20  $\mu$ m.



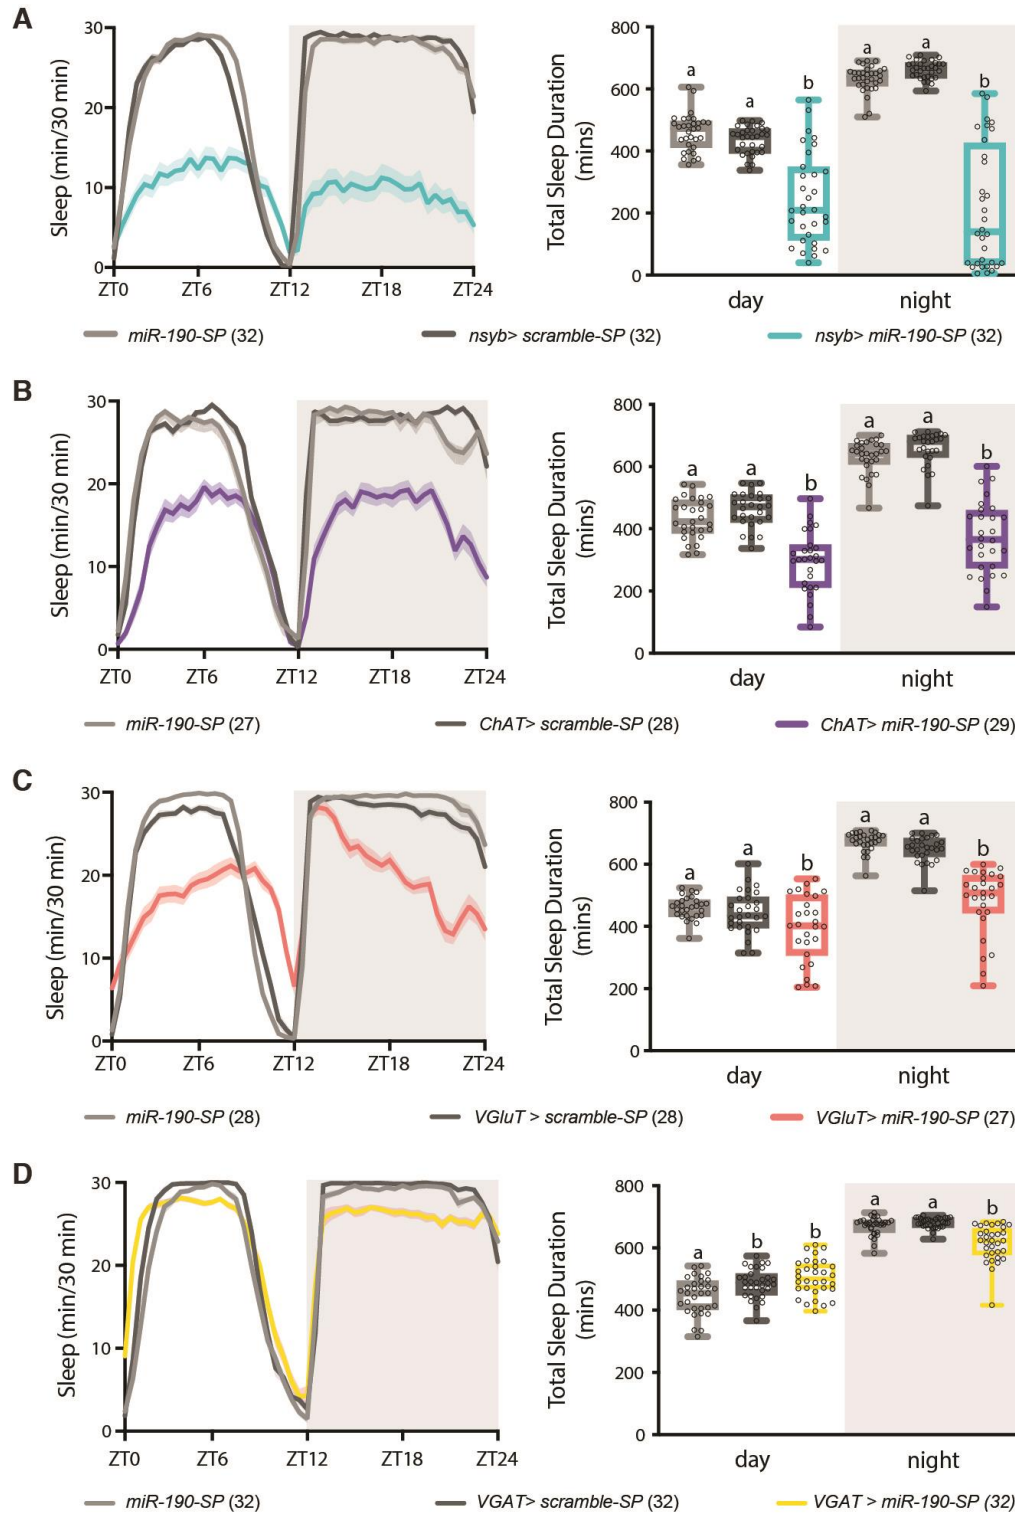

652

653

654

655

**Figure S5. Suppression of miR-190 function reduces total sleep.** (A-D) Left panels: sleep per 30 mins across 24 hours of a 12:12 light:dark cycle. Right panels: Quantification of total sleep duration when miR-190 function is suppressed in all neurons with *nsyb-Gal4*, a panneuronal

656 driver (**A**), cholinergic neurons with *ChAT-Gal4* (**B**), glutamatergic neurons with *VGluT-Gal4*  
657 (**C**), and GABAergic neurons with *VGAT-Gal4* (**D**). Data are shown as mean  $\pm$  SEM, and gray  
658 circles show individual values. Statistical differences are indicated by letters, with genotypes that  
659 are not significantly different having the same letter. Data were analyzed with one-way ANOVA  
660 with Tukey's multiple comparisons test or Kruskal-Wallis with Dunn's multiple comparisons  
661 test (depending on data set structure),  $p < 0.05$ .

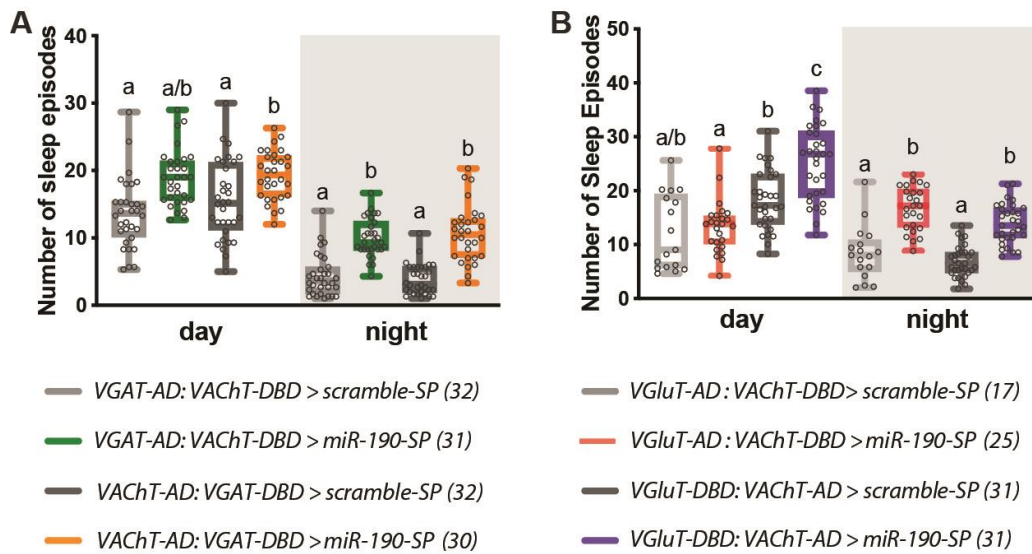

662

663 **Figure S6. Suppression of miR-190 in GABA<sup>ACh</sup> and Glu<sup>ACh</sup> neurons with two independent**  
664 **split-Gal4s fragments sleep and increases the number of sleep episodes.** Sleep fragmentation  
665 is characterized by both reduced sleep episode duration (as shown in Fig. 3BC) and by increased  
666 number of episodes. **(A)** MiR-190 suppression in GABA<sup>ACh</sup> neurons increases sleep episodes  
667 number significantly. **(B)** MiR-190 suppression in Glu<sup>ACh</sup> neurons makes the number of sleep  
668 episodes increase significantly during nighttime. Data are shown as mean  $\pm$  SEM, and gray  
669 circles show individual values. Statistical differences are indicated by letters, with genotypes that  
670 are not significantly different having the same letter. Data were analyzed with one-way ANOVA  
671 with Tukey's multiple comparisons test or Kruskal-Wallis with Dunn's multiple comparisons  
672 test (depending on data set structure),  $p < 0.05$ .



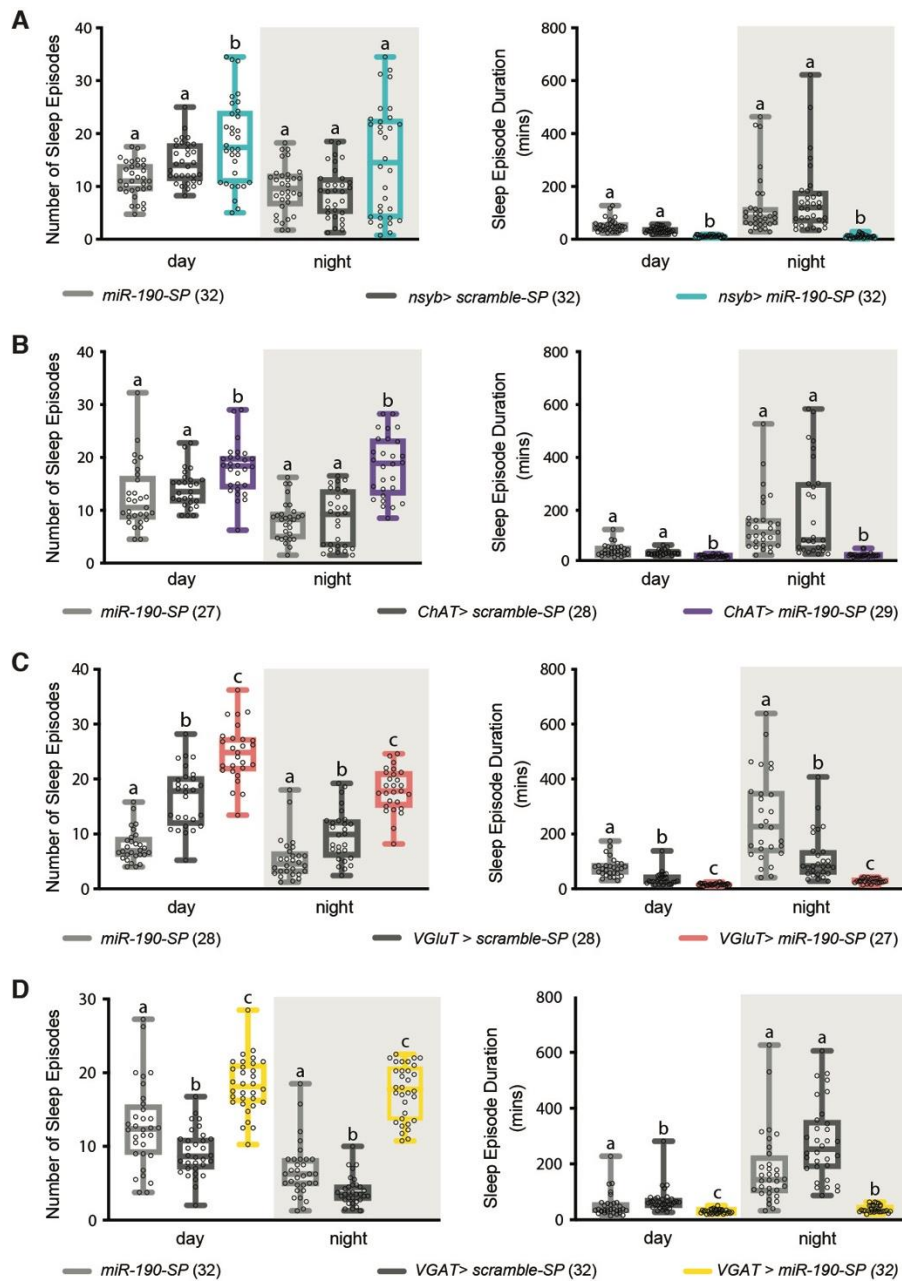

673

674

675

676

677

678

679

**Figure S7. Sleep fragmentation when miR-190 function is suppressed.** Quantification of number of sleep episodes (left) and episode duration (right) when miR-190 function is suppressed in all neurons with *nsyb-Gal4* a panneuronal driver (**A**), cholinergic neurons with *ChAT-Gal4* (**B**), glutamatergic neurons with *VGluT-Gal4* (**C**), and GABAergic neurons with *VGAT-Gal4* (**D**). Data are shown as mean  $\pm$  SEM, and gray circles show individual values. Statistical differences are indicated by letters, with genotypes that are not significantly different

680 having the same letter. Data were analyzed with one-way ANOVA with Tukey's multiple  
681 comparisons test or Kruskal-Wallis with Dunn's multiple comparisons test (depending on data  
682 set structure),  $p < 0.05$ .

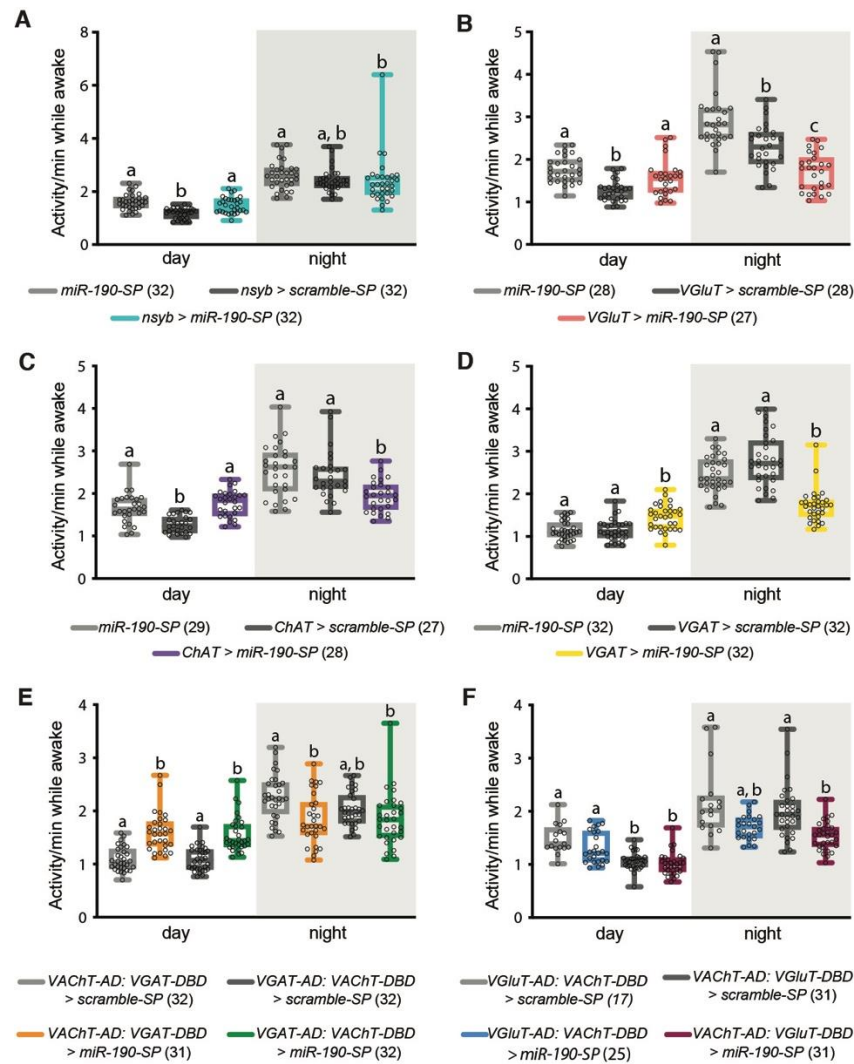

683

684

685

686

687

688

689

690

691

**Figure S8. Activity while awake is either not affected or reduced when miR-190 function is suppressed.** Quantification of activity while awake when miR-190 function is suppressed in all neurons with *nsyb-Gal4* a panneuronal driver (**A**), glutamatergic neurons with *VGluT-Gal4* (**B**), cholinergic neurons with *ChAT-Gal4* (**C**), GABAergic neurons with *VGAT-Gal4* (**D**), GABA<sup>ACh</sup> neurons with two different split-Gal4s (**E**), and Glu<sup>ACh</sup> neurons with two different split-Gal4 drivers (**F**). Data are shown as mean  $\pm$  SEM, and gray circles show individual values. Statistical differences are indicated by letters, with genotypes that are not significantly different having the same letter. Data were analyzed with one-way ANOVA with Tukey's multiple comparisons test

692 or Kruskal-Wallis with Dunn's multiple comparisons test (depending on data set structure),  $p <$   
693 0.05.

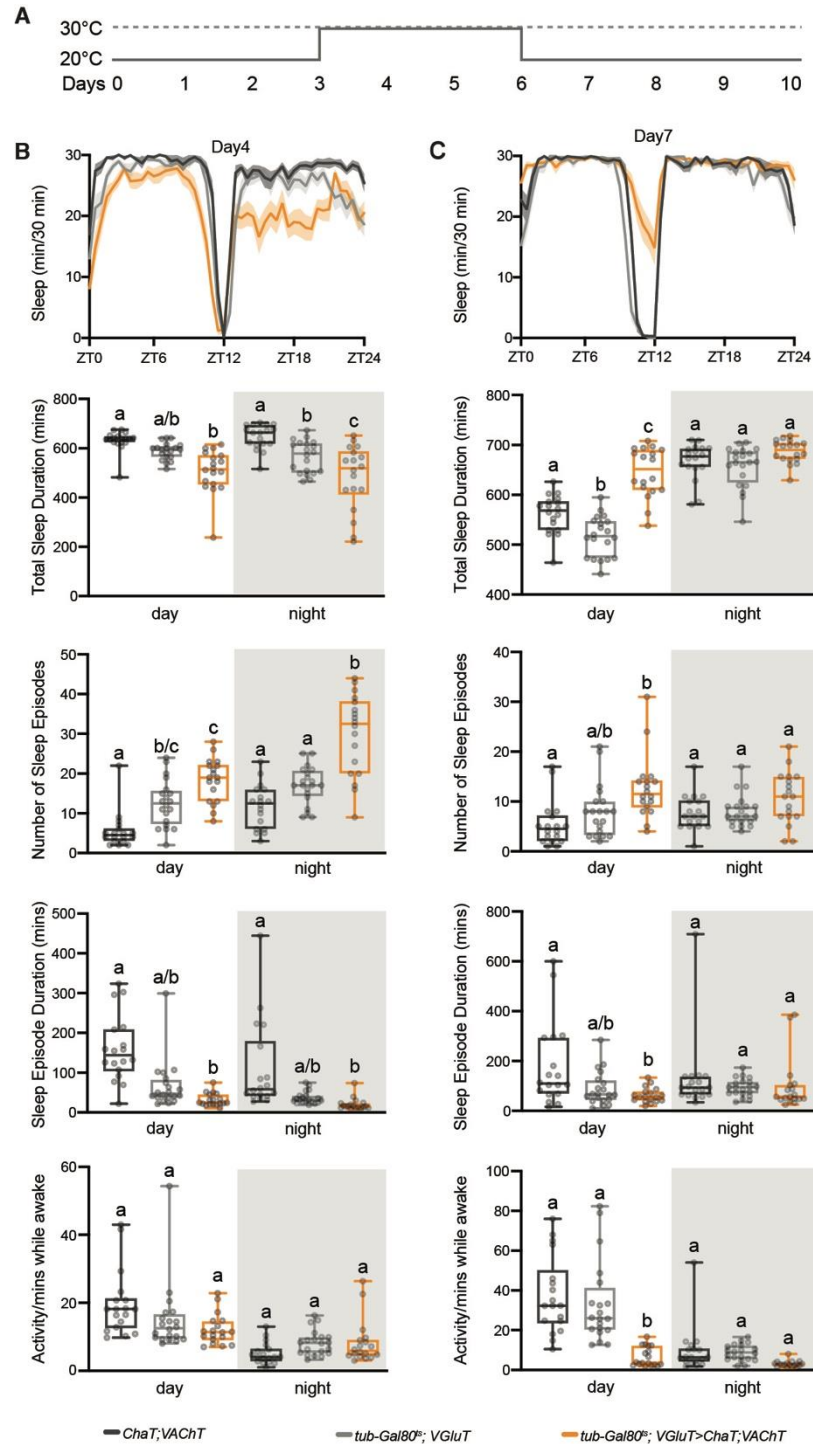

694

695

**Figure S9. Overexpression of ChAT and VAcHT in adult glutamatergic neurons decreases and fragments sleep.** (A) Schematic diagram of temperature shift to 30 °C on day 4 and back to

696

20 °C on day 7. (B) Overexpression of ChAT and VAcHT in glutamatergic neurons on day 4

697

decreases nighttime sleep significantly and increases the number of nighttime sleep episodes

698

699 significantly. (C) On day 7, daytime sleep rebounds significantly, overshooting basal levels,  
700 though it is notable that there is a suppression of locomotor activity as well. Sleep structure  
701 returns to normal. N=18-20. Data are shown as mean  $\pm$  SEM, and gray circles show individual  
702 values. Statistical differences are indicated by letters, with genotypes that are not significantly  
703 different having the same letter. Data were analyzed with one-way ANOVA with Tukey's  
704 multiple comparisons test or Kruskal-Wallis with Dunn's multiple comparisons test (depending  
705 on data set structure),  $p < 0.05$ .

706

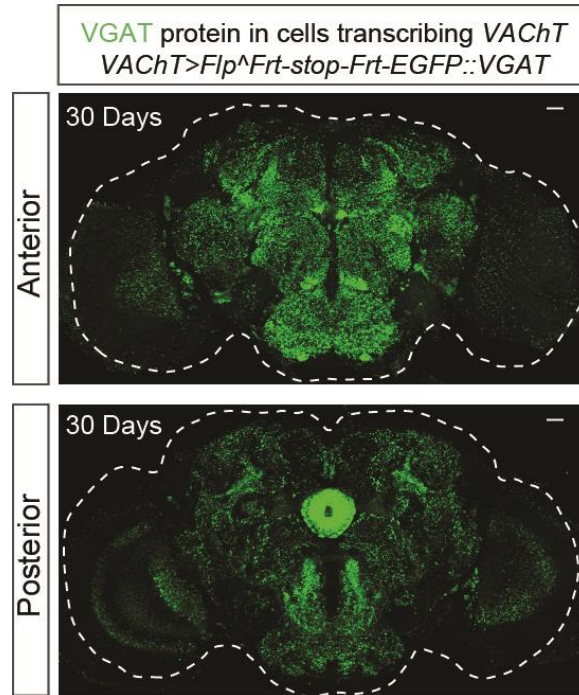

707

708

709

710

711

**Figure S10. In 30 days aging flies, *VAcH*T-*Gal4* flip-out derepression of *EGFP*::*VGAT* shows a pattern unchanged by age.** Anterior pictures are shown in upper panel, with posterior pictures in lower panel. Young flies are shown for comparison in Fig. 1I. Scale bars = 20  $\mu$ m.

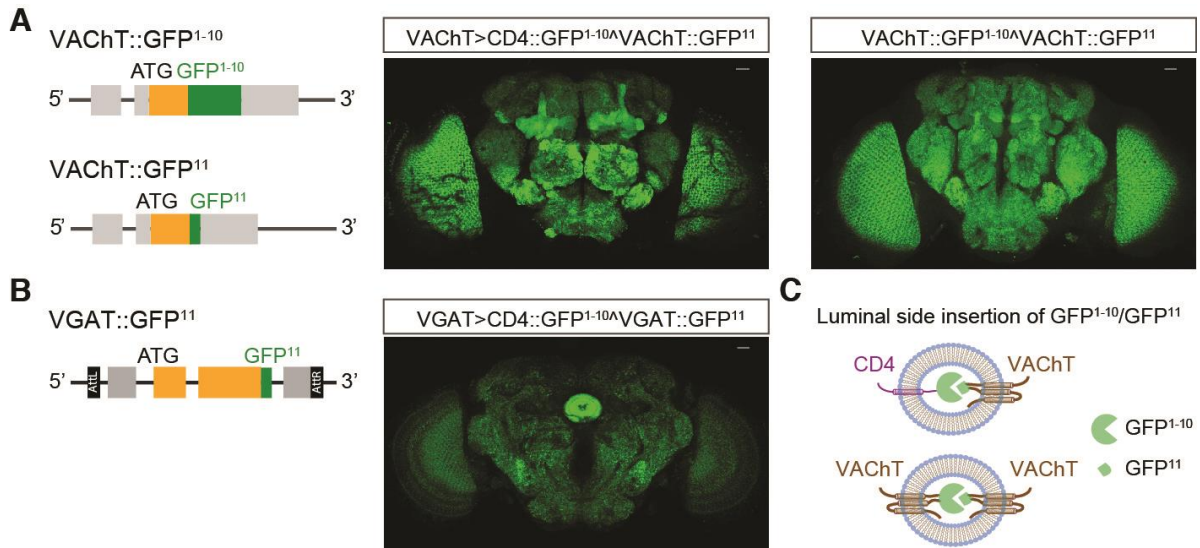

712

713

**Figure S11. *VAcHT::GFP<sup>1-10</sup>*, *VAcHT::GFP<sup>11</sup>* and *VAcHT::GFP<sup>11</sup>* display split Gal4 on the**

714

**luminal side of synaptic vesicles. (A)** Schematic diagrams in left panel show the *VAcHT*

715

insertion sites for *GFP<sup>1-10</sup>* and *GFP<sup>11</sup>* used to create CRISPR alleles. These are predicted to be

716

luminal (<https://phobius.sbc.su.se/>). To test this, we crossed *VAcHT::GFP<sup>11</sup>* with *VAcHT>UAS-*

717

*CD4-GFP<sup>1-10</sup>* which is known to be luminal in vesicles. Strong GFP signal confirms *GFP<sup>11</sup>* is

718

located on the luminal side. Crossing *VAcHT::GFP<sup>1-10</sup>* and *VAcHT::GFP<sup>11</sup>* also reconstitutes a

719

strong signal confirming that *VAcHT::GFP<sup>1-10</sup>* also displays on the luminal side. **(B)** Schematic

720

diagram in left panel shows the *VGAT* insertion site for *GFP<sup>11</sup>*. Reconstituted GFP signal for

721

*VGAT>CD4-GFP<sup>1-10</sup>* and *VGAT::GFP<sup>11</sup>* indicate the *VGAT-GFP<sup>11</sup>* displays on the luminal side.

722

**(C)** The cartoon shows the strategy: only when *GFP<sup>1-10</sup>* and *GFP<sup>11</sup>* are located on the same side

723

of the vesicle membrane can GFP signal be reconstituted and detected. Scale bars = 20  $\mu$ m.

724

725

726



727

**Table S1.**

728

Guide RNAs for VAcHt, VGAT and VGluT lines.

729

|            |                       |
|------------|-----------------------|
| VAcHt-gRNA | GGGCCGACGCCTCCACCGTTG |
| VGAT-gRNA  | GCGTTCTGGAATTTGCTGTC  |
| VGluT-gRNA | GAAGGGTCTGACGGCGTTTA  |

730

731  
732  
733

**Table S2.**  
Primers for S2 cell assay plasmids.

|                                        |                              |                                                                                |
|----------------------------------------|------------------------------|--------------------------------------------------------------------------------|
| pAc5.1-Fluc-<br>ChaT-3'UTR             | Forward primer               | GATCGCCGTGTAAGCGGCCGCTCGAGACG<br>AACTAGACTAGAATGTC                             |
|                                        | Reverse primer               | GGCTTACCTTCGAAGGGCCCTCTAGAGGTT<br>TGTAATGCATTTATTT                             |
| pAc5.1-Fluc-<br>VACHT-3'UTR            | Forward primer               | GATCGCCGTGTAAGCGGCCGCTCGAGACT<br>GTTGCCCGAACAGATA                              |
|                                        | Reverse primer               | GGCTTACCTTCGAAGGGCCCTCTAGACCAT<br>GGTTAACAATTATATT                             |
| pAc5.1-Fluc-<br>ChaT-3'UTR-<br>190-del | Forward primer<br>Fragment 1 | CGAACTAGACTAGAATGTTCGCTAGGATTG<br>GGGTCCACCAGAAAAAAAAAAGTTAATG<br>TACCTAAGCAGG |
|                                        | Reverse primer<br>Fragment 1 | TACGAGGATACTTTGGTAACAAAGCGAAT<br>GGGTTGCGTAT                                   |
|                                        | Forward primer<br>Fragment 2 | ATACGCAACCCATTTCGCTTTGTTACCAAAG<br>TATCCTCGTA                                  |
|                                        | Reverse primer<br>Fragment 2 | TGGGATGTATATAAATTTATATTGTTACGT<br>CTCAAGTCTA                                   |
|                                        | Forward primer<br>Fragment 3 | TAGACTTGAGACGTAACAATATAAATTTA<br>TATACATCCCA                                   |
|                                        | Reverse primer<br>Fragment 3 | GGCTTACCTTCGAAGGGCCCTCTAGAGGTT<br>TGTAATGCATTTATTT                             |
| pAc5.1-Mir-190                         | Forward primer               | GACCCCGGATCGGGGTACCTACTAGTCGA<br>ACTAATTGATGGTTCCA                             |
|                                        | Reverse primer               | CCTTCGAAGGGCCCTCTAGACTCGAGGCG<br>AGGGTCACAGTAATAAT                             |
| pAc5.1-Mir-<br>scramble                | Forward primer               | CAGAGACCCCGGATCGGGGTACCTGGGCG<br>TATAGACGTGTTACACCTCGAGTCTAGAG<br>GGCCCTTCGA   |
|                                        | Reverse primer               | TCGAAGGGCCCTCTAGACTCGAGGTGTAA<br>CACGTCTATACGCCAGGTACCCCGATCC<br>GGGGTCTCTG    |

734  
735  
736

737  
738  
739

**Table S3.**  
Fly genotypes for figures.

| Figure                 | Genotype                                                                                                                                                                                                 |
|------------------------|----------------------------------------------------------------------------------------------------------------------------------------------------------------------------------------------------------|
| Fig. 1B                | VGluT::AD/+; VACHT::DBD/UAS-myrGFP-2A-RedStinger                                                                                                                                                         |
| Fig. 1C                | VGAT::AD/+; VACHT::DBD/UAS-myrGFP-2A-RedStinger                                                                                                                                                          |
| Fig. 1D:Left to right  | VGAT::AD/+; VACHT::DBD/UAS-UNC84::GFP<br>VGluT::AD/+; VACHT::DBD/UAS-UNC84::GFP                                                                                                                          |
| Fig. 1I:Left to right  | UAS-Flp, Frt-stop-Frt-EGFP::VGluT/+; VACHT-Gal4/+<br>UAS-Flp/VGluT-Gal4; Frt-stop-Frt-EGFP::VACHT/+<br>UAS-Flp, Frt-stop-Frt-EGFP::VGAT/+; VACHT-Gal4/+<br>UAS-Flp/VGAT-Gal4; Frt-stop-Frt-EGFP::VACHT/+ |
| Fig. 2C:Left to right  | UAS-Flp/VGluT-Gal4; Frt-stop-Frt-EGFP::VACHT/UAS-scramble-SP<br>UAS-Flp/VGluT-Gal4; Frt-stop-Frt-EGFP::VACHT/UAS-miR-190-SP                                                                              |
| Fig. 2D:Left to right  | UAS-Flp/VGAT-Gal4; Frt-stop-Frt-EGFP::VACHT/UAS-scramble-SP<br>UAS-Flp/VGAT-Gal4; Frt-stop-Frt-EGFP::VACHT/UAS-miR-190-SP                                                                                |
| Fig. 2E:Left to right  | UAS-Flp, Frt-stop-Frt-EGFP::VGluT/+; VACHT-Gal4/UAS-scramble-SP<br>UAS-Flp, Frt-stop-Frt-EGFP::VGluT/+; VACHT-Gal4/UAS-miR-190-SP                                                                        |
| Fig. 2F:Left to right  | UAS-Flp, Frt-stop-Frt-EGFP::VGAT/+; VACHT-Gal4/UAS-scramble-SP<br>UAS-Flp, Frt-stop-Frt-EGFP::VGAT/+; VACHT-Gal4/UAS-miR-190-SP                                                                          |
| Fig. 4B                | Frt-stop-Frt-EGFP::VGluT/+; Flp-VACHT-3'UTR/+                                                                                                                                                            |
| Fig. 4C                | Frt-stop-Frt-EGFP::VGAT/+; Flp-VACHT-3'UTR/+                                                                                                                                                             |
| Fig. 4D                | UAS-Flp/VGAT-Gal4; Frt-stop-Frt-EGFP::VACHT/+                                                                                                                                                            |
| Fig. 4E                | VGAT::GFP <sup>11</sup> /+; VACHT::GFP <sup>1-10</sup> /+                                                                                                                                                |
| Fig. S1B:Left to right | VACHT-Gal4/UAS-myrGFP-2A-RedStinger<br>VGluT-Gal4/+; UAS-myrGFP-2A-RedStinger/+<br>VGAT-Gal4/+; UAS-myrGFP-2A-RedStinger/+                                                                               |
| Fig. S1C               | VGluT::DBD/+; VACHT::AD/UAS-myrGFP-2A-RedStinger                                                                                                                                                         |
| Fig. S1D               | VGAT::DBD/+; VACHT-AD/UAS-myrGFP-2A-RedStinger                                                                                                                                                           |
| Fig. S3A:Left to right | UAS-Flp/+; Frt-stop-Frt-EGFP::VACHT/+<br>UAS-Flp/+; VT030559-Gal4/Frt-stop-Frt-EGFP::VACHT                                                                                                               |
| Fig. S3B:Left to right | UAS-Flp, Frt-stop-Frt-EGFP::VGluT/+<br>UAS-Flp, Frt-stop-Frt-EGFP::VGluT/+; GMR81C04-Gal4/+                                                                                                              |
| Fig. S3C:Left to right | UAS-Flp, Frt-stop-Frt-EGFP::VGAT/+<br>UAS-Flp, Frt-stop-Frt-EGFP::VGAT/GH146-Gal4                                                                                                                        |
| Fig. S4A:Left to right | UAS-Flp/VGluT-Gal4; Frt-stop-Frt-EGFP::VACHT/UAS-scramble-SP<br>UAS-Flp/VGluT-Gal4; Frt-stop-Frt-EGFP::VACHT/UAS-miR-190-SP                                                                              |
| Fig. S4B:Left to right | UAS-Flp/VGAT-Gal4; Frt-stop-Frt-EGFP::VACHT/UAS-scramble-SP<br>UAS-Flp/VGAT-Gal4; Frt-stop-Frt-EGFP::VACHT/UAS-miR-190-SP                                                                                |

|                           |                                                                    |
|---------------------------|--------------------------------------------------------------------|
| Fig. S10:Left<br>to right | UAS-Flp, Frt-stop-Frt-EGFP::VGluT/+; VACHT-Gal4/+                  |
|                           | UAS-Flp, Frt-stop-Frt-EGFP::VGAT/+; VACHT-Gal4/+                   |
| Fig.S11A:Left<br>to right | UAS-CD4-GFP <sup>1-10</sup> , VACHT-GFP <sup>11</sup> /VACHT-Gal4  |
|                           | VACHT-GFP <sup>1-10</sup> /VACHT-GFP <sup>11</sup>                 |
| Fig. S11B                 | VGAT-Gal4/VACHT-GFP <sup>11</sup> ; UAS-CD4-GFP <sup>1-10</sup> /+ |

740

741

742        **Data S1.**  
743        Plasmids maps.  
744
